# Supplementary material
Source: PubMed Central journal article supplement (PMC4443089)
Supplement: ijcem0008-3595-f5.pdf [file ijcem0008-3595-f5.pdf]

## CD44 family proteins in gastric cancer

**Table S1.** Meta-analysis of CD44v5 in gastric cancer

| Stratification            | Studies (N) | Patients (N) | Model  | RR (95% CI)      | $P_{RR}$ | $P$    | I <sup>2</sup> (%) | $P_{bias}$ |
|---------------------------|-------------|--------------|--------|------------------|----------|--------|--------------------|------------|
| Degree of differentiation | 4           | 652          | Random | 0.93 (0.66-1.31) | 0.6852   | 0.0022 | 79.4               | 0.0811     |

RR: risk ratio; N: number of studies or patients; CI: confidence interval;  $P_{RR}$ : significance of RR;  $P$ : significance for heterogeneity of publications;  $P_{bias}$ : significance for publication bias.

**Table S2.** Sensitivity analysis of CD44 family proteins in gastric cancer

| Stratification            | CD44v6           |          |                   |          | CD44s                 |          |
|---------------------------|------------------|----------|-------------------|----------|-----------------------|----------|
|                           | Overall survival |          | M-stage           |          | Disease free survival |          |
|                           | Log HR (95% CI)  | $P_{HR}$ | RR (95% CI)       | $P_{RR}$ | Log HR (95% CI)       | $P_{HR}$ |
| Omitting Songun, I. 2007  | 0.43 (0.03-0.83) | 0.0340   | -                 | -        | -                     | -        |
| Omitting Hong, R. L. 1995 | -                | -        | 1.92 (0.66-5.63)  | 0.2341   | 1.68 (1.09-2.27)      | < 0.0001 |
| Omitting Xin, Y. 2001     | -                | -        | 3.16 (0.98-10.13) | 0.0534   | -                     | -        |

HR: Hazard ratio; RR: risk ratio; CI: confidence interval;  $P_{HR}$ : significance of HR;  $P_{RR}$ : significance of RR.

## CD44 family proteins in gastric cancer

**Table S3.** Narrative review for the survival and CD44 family proteins

| Survival | Author      | Year | Country     | Cut off | Stage | Cancer | Cohort | Sample           | Detection | Gene   | HR   | 95% CI    | HR Extraction |
|----------|-------------|------|-------------|---------|-------|--------|--------|------------------|-----------|--------|------|-----------|---------------|
| OS       | Muller, W.  | 1997 | Germany     | 5%      | N/A   | GC     | 418    | FFPE             | WTS-IHC   | CD44v5 | 1.36 | 1.00-1.84 | Calculation   |
| OS       | Songun, I.  | 2005 | Netherlands | 5%      | N/A   | R0 GC  | 286    | FFPE             | WTS-IHC   | CD44v9 | 1.00 | 0.76-1.31 | Calculation   |
| OS       | Songun, I.  | 2006 | Netherlands | 0       | N/A   | R0 GC  | 286    | FFPE             | WTS-IHC   | CD44v5 | 0.97 | 0.74-1.28 | Calculation   |
| DFS      | Hirata, K.  | 2013 | Japan       | 3.55%   | N/A   | EGC    | 65     | FFPE             | WTS-IHC   | CD44v9 | 21.8 | 5.71-83.1 | Report-mul    |
| DFS      | Hong, R. L. | 1995 | China       | 0       | N/A   | GC     | 78     | Cryostat section | WTS-IHC   | CD44v6 | 0.77 | 0.28-2.12 | Calculation   |

OS: overall survival; DFS: disease free survival; GC: gastric cancer; EGC: early gastric cancer; R0 GC: R0 resection for gastric cancer; FFPE: formalin fixed paraffin embedded; WTS-IHC: whole tissue section-immunohistochemistry; mul: multivariate.

## CD44 family proteins in gastric cancer

**Table S4.** Narrative review for the clinicopathological characteristics and CD44 family proteins

| Clinicopathological Event | Author        | Year | N-high | Event-high | N-low | Event-low | N-total | Event-total | Detection | Gene      |
|---------------------------|---------------|------|--------|------------|-------|-----------|---------|-------------|-----------|-----------|
| Location (Non-cardia)     | Chong, J. M.  | 1997 | 80     | 63         | 24    | 19        | 104     | 82          | WTS-IHC   | CD44v3-5  |
| Location (Non-cardia)     | Hirata, K.    | 2013 | 13     | 13         | 52    | 51        | 65      | 64          | WTS-IHC   | CD44v9    |
| T-stage (3-4)             | Muller, W.    | 1997 | 273    | 92         | 145   | 41        | 418     | 133         | WTS-IHC   | CD44v5    |
| T-stage (3-4)             | Mirecka, J.   | 1995 | 70     | 24         | 42    | 15        | 112     | 39          | WTS-IHC   | CD44v5    |
| T-stage (3-4)             | Yasui, W.     | 1998 | 46     | 20         | 77    | 13        | 123     | 33          | WTS-IHC   | CD44v9    |
| T-stage (3-4)             | Yamaguchi, A. | 1995 | 65     | 36         | 129   | 71        | 194     | 107         | WTS-IHC   | CD44v8-10 |
| N-stage (1-3)             | Ura, H.       | 1996 | 22     | 16         | 88    | 50        | 110     | 66          | WTS-IHC   | CD44v3    |
| N-stage (1-3)             | Chong, J. M.  | 1997 | 80     | 42         | 24    | 17        | 104     | 59          | WTS-IHC   | CD44v3-5  |
| N-stage (1-3)             | Muller, W.    | 1997 | 273    | 159        | 145   | 70        | 418     | 229         | WTS-IHC   | CD44v5    |
| N-stage (1-3)             | Yasui, W.     | 1998 | 46     | 20         | 77    | 11        | 123     | 31          | WTS-IHC   | CD44v9    |
| N-stage (1-3)             | Yamaguchi, A. | 1995 | 65     | 53         | 129   | 104       | 194     | 157         | WTS-IHC   | CD44v8-10 |
| TNM-stage (III-IV)        | Yasui, W.     | 1998 | 77     | 20         | 46    | 9         | 123     | 29          | WTS-IHC   | CD44v9    |
| TNM-stage (III-IV)        | Yamaguchi, A. | 1995 | 65     | 52         | 129   | 99        | 194     | 151         | WTS-IHC   | CD44v8-10 |
| Lymphatic invasion (+)    | Chong, J. M.  | 1997 | 80     | 54         | 24    | 18        | 104     | 72          | WTS-IHC   | CD44v3-5  |
| Lymphatic invasion (+)    | Muller, W.    | 1997 | 273    | 147        | 145   | 52        | 418     | 199         | WTS-IHC   | CD44v5    |
| Lymphatic invasion (+)    | Yamaguchi, A. | 1995 | 65     | 57         | 129   | 113       | 194     | 170         | WTS-IHC   | CD44v8-10 |
| Vascular invasion (+)     | Chong, J. M.  | 1997 | 80     | 50         | 24    | 18        | 104     | 68          | WTS-IHC   | CD44v3-5  |
| Vascular invasion (+)     | Muller, W.    | 1997 | 273    | 78         | 145   | 23        | 418     | 101         | WTS-IHC   | CD44v5    |
| Vascular invasion (+)     | Yamaguchi, A. | 1995 | 65     | 48         | 129   | 75        | 194     | 123         | WTS-IHC   | CD44v8-10 |
| Peritoneal invasion (+)   | Isozaki, H.   | 1998 | 47     | 5          | 61    | 6         | 108     | 11          | WTS-IHC   | CD44s     |
| Peritoneal invasion (+)   | Yamaguchi, A. | 1995 | 65     | 16         | 129   | 49        | 194     | 65          | WTS-IHC   | CD44v8-10 |
| Liver metastasis (+)      | Isozaki, H.   | 1998 | 47     | 29         | 61    | 15        | 108     | 44          | WTS-IHC   | CD44s     |
| Liver metastasis (+)      | Ura, H.       | 1996 | 22     | 8          | 88    | 22        | 110     | 30          | WTS-IHC   | CD44v3    |
| Liver metastasis (+)      | Yamaguchi, A. | 1995 | 65     | 15         | 129   | 13        | 194     | 28          | WTS-IHC   | CD44v8-10 |
| Differentiation (PD/UN)   | Mirecka, J.   | 1995 | 70     | 41         | 41    | 28        | 111     | 69          | WTS-IHC   | CD44v5    |
| Differentiation (PD/UN)   | Li, H.        | 2000 | 17     | 12         | 57    | 41        | 74      | 53          | WTS-IHC   | CD44v7    |
| Differentiation (PD/UN)   | Li, H.        | 2000 | 4      | 4          | 70    | 49        | 74      | 53          | WTS-IHC   | CD44v8-10 |
| Differentiation (PD/UN)   | Yasui, W.     | 1998 | 328    | 81         | 746   | 258       | 1074    | 339         | WTS-IHC   | CD44v9    |
| Lauren type (Diffuse)     | Chong, J. M.  | 1997 | 80     | 43         | 24    | 18        | 104     | 61          | WTS-IHC   | CD44v3-5  |
| Lauren type (Diffuse)     | Muller, W.    | 1997 | 273    | 60         | 145   | 94        | 418     | 154         | WTS-IHC   | CD44v5    |
| Cancer recurrence (+)     | Chen, S.      | 2013 | 27     | 10         | 125   | 22        | 152     | 32          | WTS-IHC   | CD44s     |

PD: poorly differentiated; UN: undifferentiated; WTS-IHC: whole tissue section-immunohistochemistry.
